# Supplementary material for: DEAD box RNA helicase 5 is a new pro-viral host factor for Sindbis virus infection
Source: Springer Nature journal article supplement (doi:10.1186/s12985-024-02349-3), 2024-03-29
Supplement: MOESM2 [file 26921422]

**A**

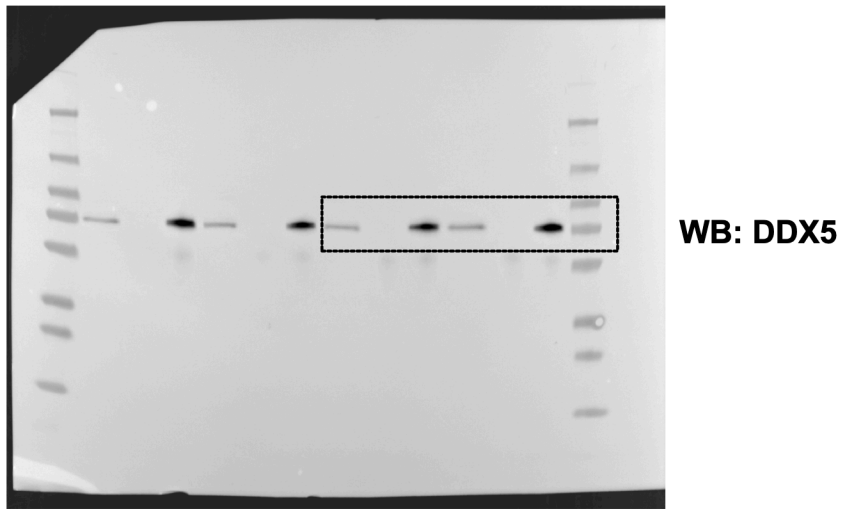

**D**

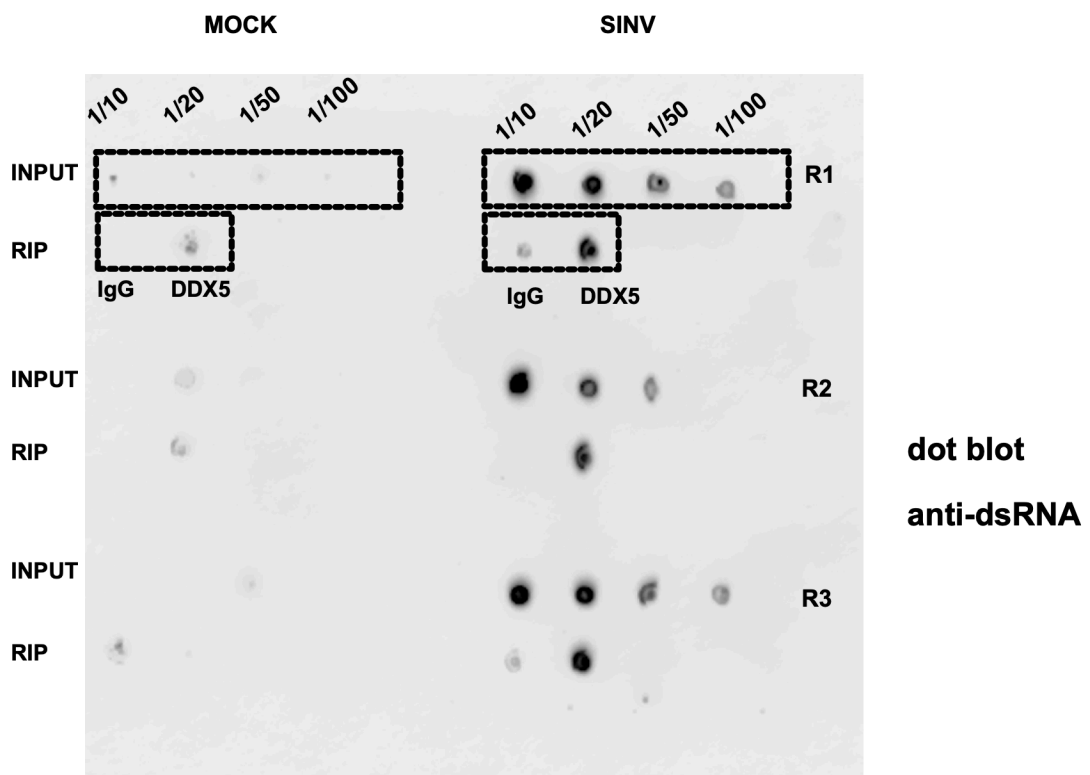

**Figure S1 (related to Figure 1)**

**B**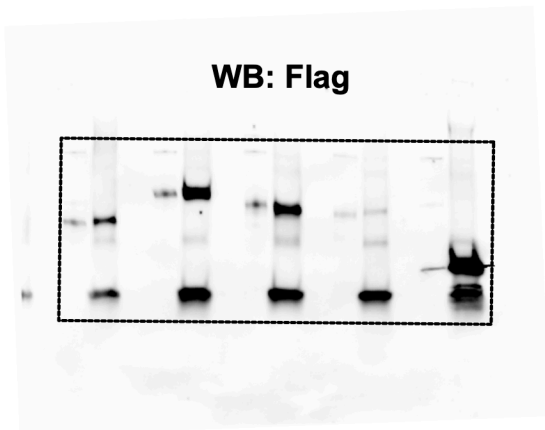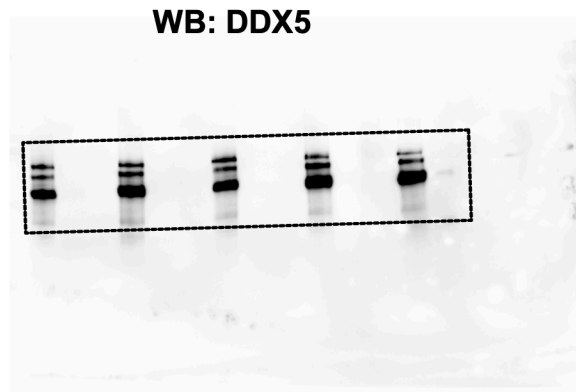**C**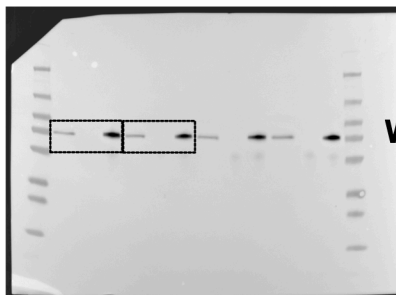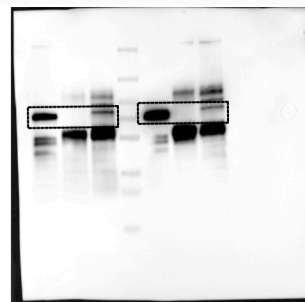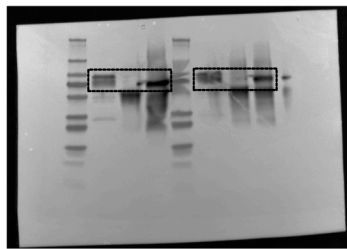**WB: DDX17**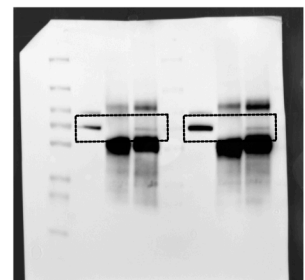**WB: DDX5**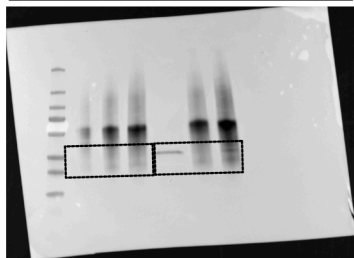**WB: Capsid**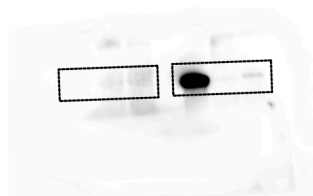**WB: Capsid****D**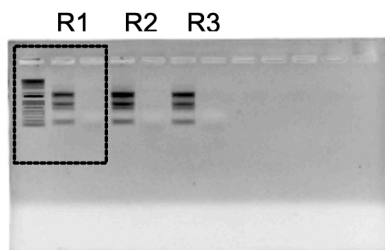**E**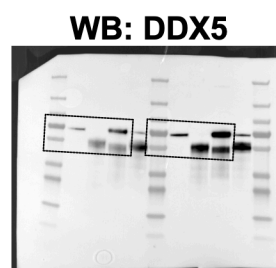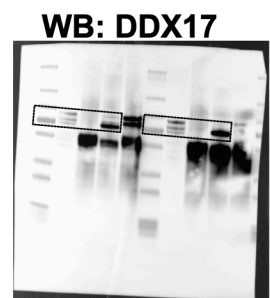**WB: Capsid**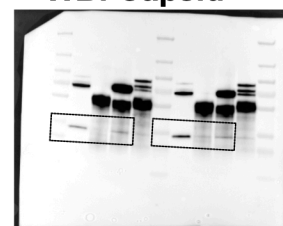**Figure S2 (related to Figure 3)**

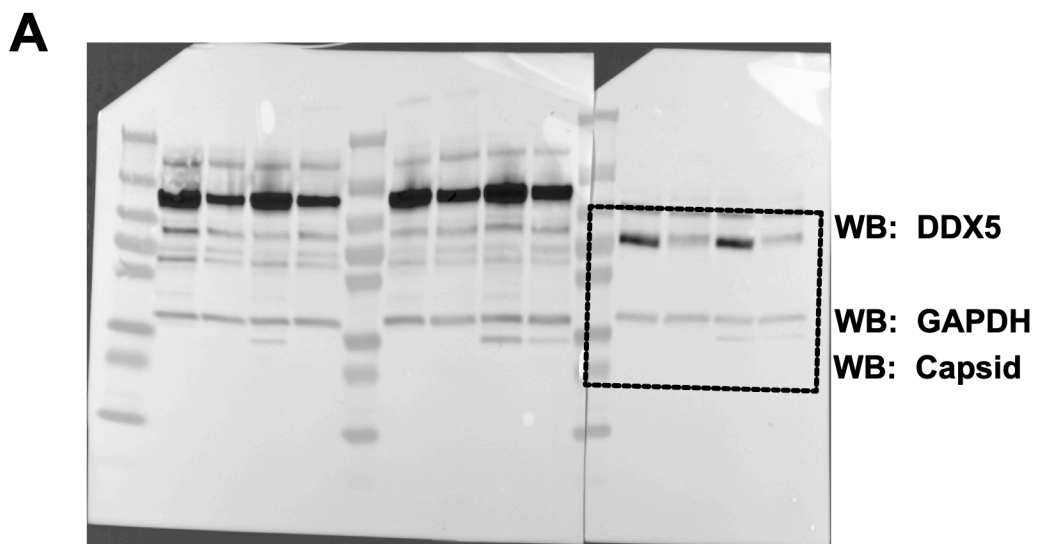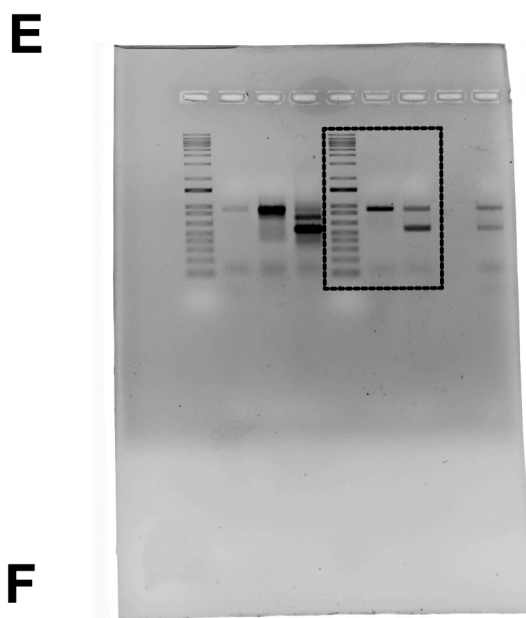

**F**

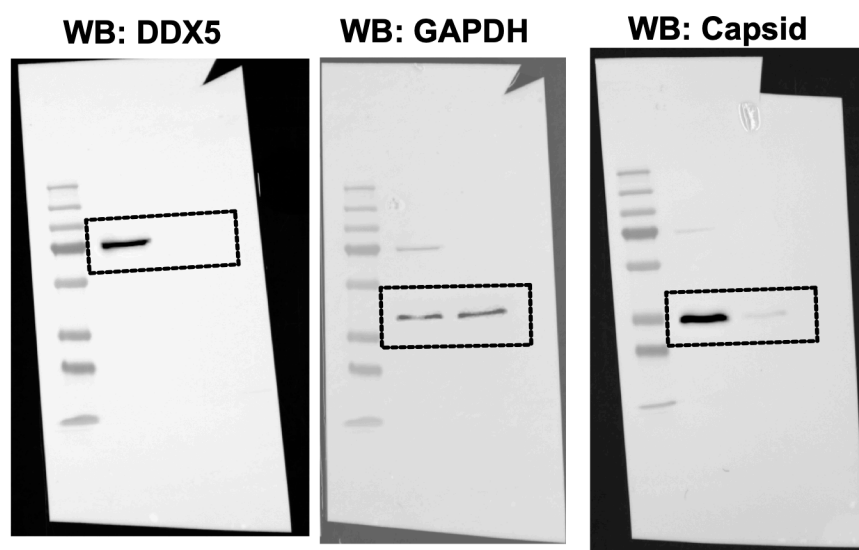

**Figure S3 (related to Figure 4)**

**A**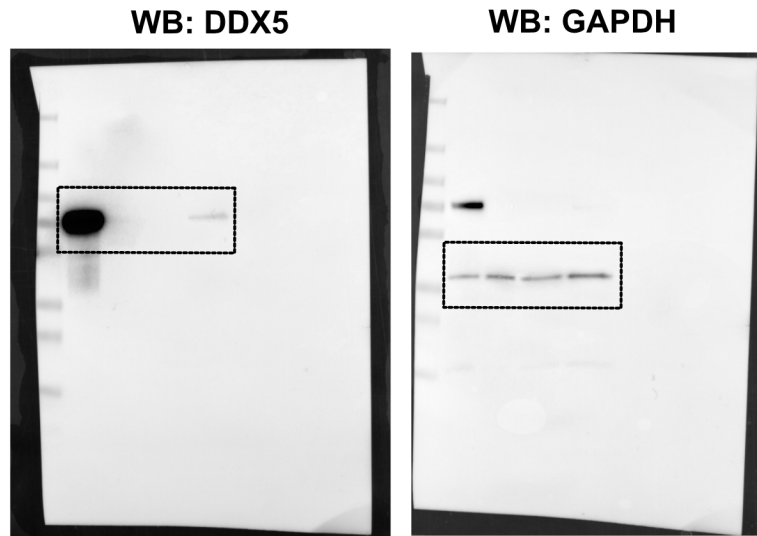**B**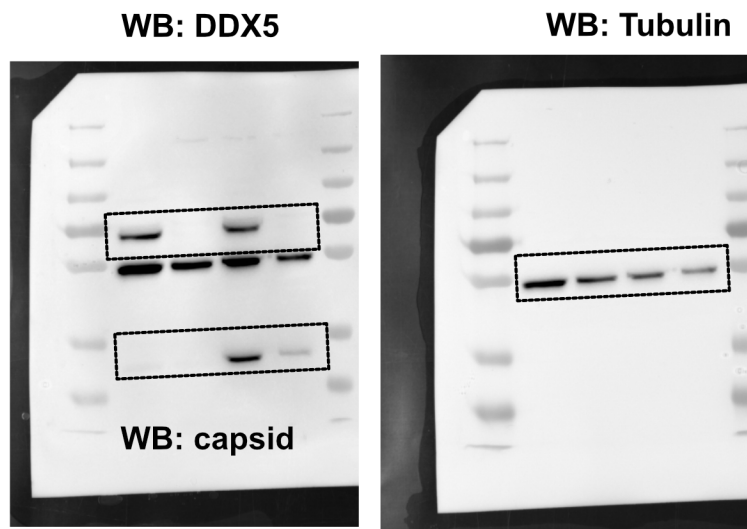**C**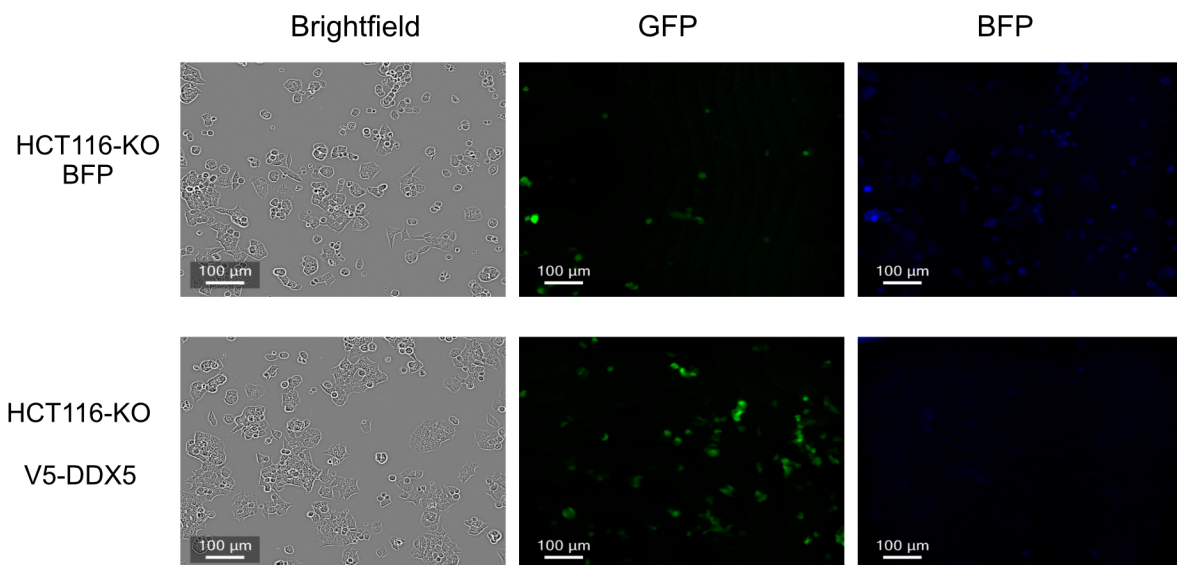

**Figure S4 (related to Figure 5)**



**A**

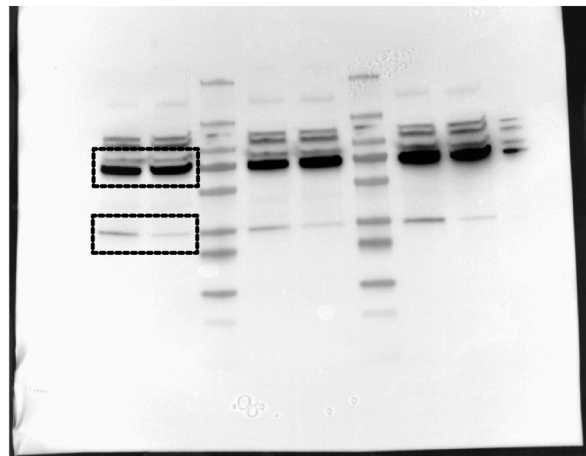

WB: DDX5

WB: capsid

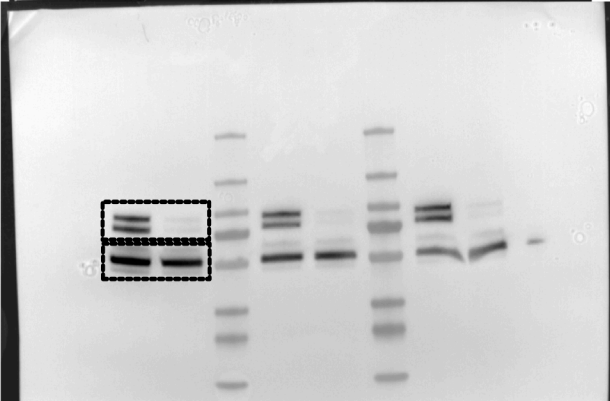

WB: DDX17

WB: Tubulin

**E**

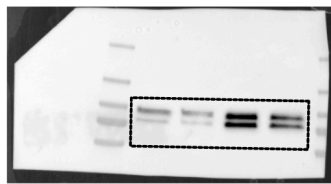

WB: DDX17

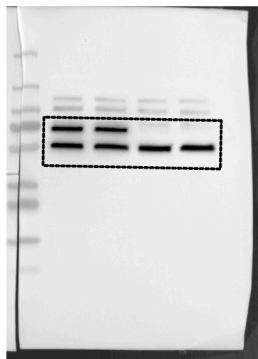

WB: DDX5  
WB: Tubulin

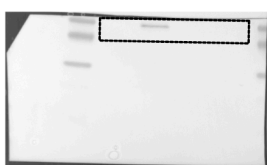

WB: capsid

**F**

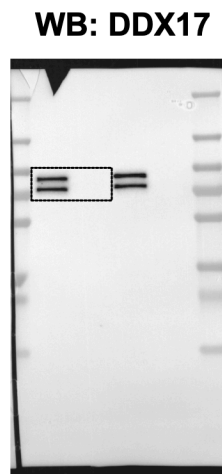

WB: DDX17

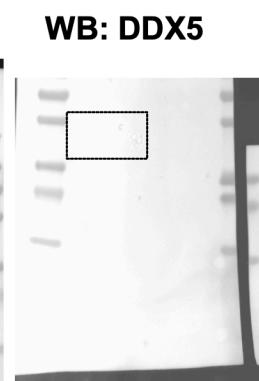

WB: DDX5

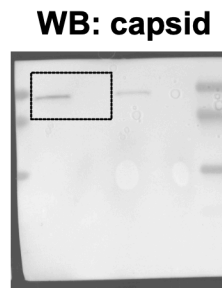

WB: capsid

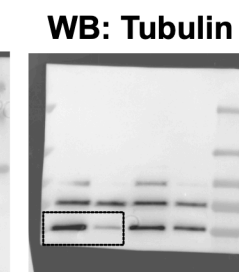

WB: Tubulin

**Figure S5 (related to Figure 6)**
